# Supplementary material
Source: publisher figshare collection journal article supplement (https://gsajournals.figshare.com/articles/dataset/_/12568265)
Supplement: Supplementary file 1 [file 1]

1    **Supplementary Table S1. Complementation status of *l(3)tb* with cytologically mapped deletion lines**

| S.No. | Bloomington<br>Stock Number | Deletion Lines                                                               | Estimated<br>Cytological<br>Break points | Status<br>of<br>Complementation |
|-------|-----------------------------|------------------------------------------------------------------------------|------------------------------------------|---------------------------------|
| 1.    | BL: 6554                    | <i>Df(3L)XG8</i>                                                             | 71C3-D1;71F2-5                           | No                              |
| 2.    | BL:6548                     | <i>Df(3L)XG1</i>                                                             | 71C3-D1;71F2-5                           | No                              |
| 3.    | BL:6603                     | <i>Df(3L)X-21.2</i>                                                          | 71F1;72A2                                | No                              |
| 4.    | BL:6157                     | <i>Df(3L)D-5rv12,e<sup>l</sup></i>                                           | 70C2;72A1                                | No                              |
| 5.    | BL:6558                     | <i>Df(3L)XG15</i>                                                            | 71A3;71F4                                | Yes                             |
| 6.    | BL:3641                     | <i>Df(3L)th<sup>102</sup>,h<sup>l</sup>,kni<sup>ri-l</sup>,e<sup>l</sup></i> | 72A2;72D10                               | Yes                             |

2

3

4 **Supplementary Table S2. Complementation analysis of *l(3)tb* with lethal transposon insertion lines**

| S. No. | Stock | Symbol                                      | Gene Affected/<br>Estimated cytology* | Genomic<br>Sequence<br>Coordinates* | Complementation Status |
|--------|-------|---------------------------------------------|---------------------------------------|-------------------------------------|------------------------|
| 1.     | 18573 | <i>PBac{WH}DCX-EMAP<sup>02655</sup></i>     | <i>DCX-EMP</i><br>71A2                | 3L:14933115..14933115               | YES                    |
| 2.     | 12791 | <i>P{GT1}mnd<sup>BG01434</sup></i>          | <i>minidisks (mnd)</i><br>71A4        | 3L:14980561..14980561               | YES                    |
| 3.     | 17084 | <i>P{EP}Prosbeta2<sup>EP306</sup></i><br>7  | <i>Proteosome subunit β2</i><br>71B1  | 3L:14993119..14993119               | YES                    |
| 4.     | 12089 | <i>P{lacW}cp309<sup>s2172</sup></i>         | <i>cp309</i><br>71B3                  | 3L:15072574..15072574               | YES                    |
| 5.     | 21206 | <i>P{EPgy2}cp309<sup>EY1637</sup></i><br>6  | <i>cp309</i><br>71B3                  | 3L:15072713..15072713               | YES                    |
| 6.     | 16007 | <i>P{EPgy2}Aats-gly<sup>EY09021</sup></i>   | <i>Glycyl synthetase tRNA</i><br>71B4 | 3L:15088255..15088255               | YES                    |
| 7.     | 12090 | <i>P{lacW}l(3)j2A2<sup>j2A2</sup></i>       | <i>lethal(3)j2A2</i><br>71B5          | 3L:15134670..15134670               | YES                    |
| 8.     | 34467 | <i>Mi{MIC}Toll-6<sup>M102127</sup></i>      | <i>Toll-6</i><br>71C2                 | 3L:15332734                         | YES                    |
| 9.     | 16100 | <i>PBac{5HPw[+]}CG7841<sup>A372</sup></i>   | <i>CG7841</i><br>71D3                 | 3L:15500292..15500292               | YES                    |
| 10.    | 21095 | <i>P{EPgy2}CrebA<sup>EY134</sup></i><br>94  | <i>CrebA</i><br>71E1                  | 3L:15529167..15529167               | YES                    |
| 11.    | 10183 | <i>P{PZ}CrebA<sup>03576</sup></i>           | <i>CrebA</i><br>71E1                  | 3L:15537388..15537388               | YES                    |
| 12.    | 12091 | <i>P{lacW}l(3)s1754<sup>s175</sup></i><br>4 | <i>lethal(3)s1754</i><br>71E1         | 3L:15556710..15556710               | YES                    |
| 13.    | 12092 | <i>P{lacW}RhoGAP71E<sup>j6B9</sup></i>      | <i>RhoGAP71E</i><br>71E1              | 3L:15582004..15582004               | YES                    |
| 14.    | 15523 | <i>P{EPgy2}mrn<sup>EY01615</sup></i>        | <i>marionette</i><br>71E1             | 3L:15573609..15573609               | YES                    |
| 15.    | 12100 | <i>P{lacW}RhoGAP71E<sup>s1629a</sup></i>    | <i>RhoGAP71E</i><br>71E1              | 3L:15582004..15582004               | YES                    |
| 16.    | 17134 | <i>P{EP}RhoGAP71E<sup>EP</sup></i><br>3492  | <i>RhoGAP71E</i><br>71E1              | 3L:15586701..15586701               | YES                    |
| 17.    | 22649 | <i>P{EPgy2}CG7650<sup>EY2</sup></i><br>3633 | <i>CG7650</i><br>71E2                 | 3L:15603462..15603462               | YES                    |
| 18.    | 23596 | <i>Mi{ETI}CG7579<sup>MB02</sup></i><br>986  | <i>CG7579</i><br>71F1                 | 3L:15676129..15676129               | YES                    |
| 19.    | 16186 | <i>PBac{5HPw<sup>+</sup>}B259</i>           | 71F2                                  | 3L:15700304..15700457               | YES                    |
| 20.    | 17644 | <i>P{EPgy2}comm<sup>EY1015</sup></i><br>4   | <i>commisssureless</i><br>71F2        | 3L:15721560..15721560               | YES                    |
| 21.    | 21983 | <i>P{EPg}fwe<sup>HP35545</sup></i>          | <i>flower</i>                         | 3L:15809466..15809466               |                        |

|            |       |                                          |                                   |                       |            |
|------------|-------|------------------------------------------|-----------------------------------|-----------------------|------------|
|            |       |                                          | 72A1                              | 09466                 | <b>YES</b> |
| <b>22.</b> | 12794 | $P\{GTI\}DCP2^{BG01766}$                 | <i>Decapping protein2</i><br>72A1 | 3L:15819332..15819332 | <b>NO</b>  |
| <b>23.</b> | 23591 | $\underline{Mi\{ETI\}CG32150^{MB02846}}$ | CG32150<br>72A2                   | 3L:15834442..15834442 | <b>YES</b> |
| <b>24.</b> | 25339 | $Mi\{ETI\}pHCl^{MB06931}$                | <i>pHCl</i><br>72A3               | 3L:15863723..15863723 | <b>YES</b> |
| <b>25.</b> | 22126 | $P\{EPg\}HP36806$                        | 72B2                              | 3L:15948256..15948256 | <b>YES</b> |

5

6 Allele of *Decapping protein 2* ( $P\{GTI\}DCP2^{BG01766}$ ), reported to be semi-lethal in the FlyBase showed

7 non-complementation to the mutation in *l(3)tb*. \*Designates the current annotation and cytological

8 positions and molecular insertion sites as per FlyBase (R5).

**Supplementary Table S3. Primers used for characterizing deletion in *Df(3L)RM95*.**

| Primer   | Primer Details            |                         |                                            |            |             |                              | PARAMETER<br>Ta (°C)<br>/ Ext. (Sec) |
|----------|---------------------------|-------------------------|--------------------------------------------|------------|-------------|------------------------------|--------------------------------------|
|          | PRIMER<br>(10<br>pmol/μL) | SEQUENCE (5'→3')        | Molecular<br>Positions<br>(Flybase,<br>R5) | Tm<br>(°C) | 'GC'<br>(%) | Amplic<br>on Size<br>(In Bp) |                                      |
| Custom A | FOR                       | GCACCAACTGAGCTGTATC     | 15525318-                                  | 54.1       | 52.6        | 420                          | 54 <sup>0</sup> C/ 30sec             |
| PRY4     | REV                       | CAATCATATCGCTGTCTCACTCA |                                            | 60.3       | 43.5        |                              |                                      |
| W7500D   | FOR                       | GTCCGCCTTCAGTTGCACTT    |                                            | 62.7       | 55.0        | 1600                         | 6 <sup>0</sup> C/ 1min               |
| W11678U  | REV                       | TCATCGCAGATCAGAAGCGG    |                                            | 64.9       | 55.0        |                              |                                      |
| 3.PRY4   | FOR                       | CAATCATATCGCTGTCTCACTCA | -15948402                                  | 60.3       | 43.5        | 360                          | 54 <sup>0</sup> C / 1min             |
| Custom B | REV                       | TAGTCCACGTAAGGTGCAC     |                                            | 54.3       | 55.6        |                              |                                      |

Custom A and custom B primers were designed from the genomic region upstream and downstream to the region where the P{RS5} and P{RS3} progenitor element localized so that with the combination of PRY4, could give 420 bp and 360 bp amplicon respectively.

**Supplementary Table S4.** Overlapping set of primers for *DCP2* and thermal cycler conditions of annealing temperature and extension time for each primer pair to amplify the genomic region of *DCP2* gene in the homozygous *l(3)tb* mutant.

| PRIMER SYMBOL | PRIMER DETAILS      |                                 |                                   |                     |          |                       |
|---------------|---------------------|---------------------------------|-----------------------------------|---------------------|----------|-----------------------|
|               | PRIMER (10 pmol/μL) | SEQUENCE (5'→3')                | MOLECULAR POSITIONS (FlyBase, R5) | T <sub>m</sub> (°C) | 'GC' (%) | AMPLICON SIZE (in bp) |
| DCP2_P1       | FOR                 | AGGCTTCTCTCCCCGTAAC             | 15813182-15813746                 | 62.7                | 57.1     | 565                   |
|               | REV                 | CTGCGGGGCGAGAACACGAT            |                                   | 70.0                | 65.0     |                       |
| DCP2_P2       | FOR                 | TTCATAGGTGGGGGCGGGCA            | 15813671-15814201                 | 71.8                | 65.0     | 531                   |
|               | REV                 | ACGTTAGGGAACCACAAACACACCT       |                                   | 65.9                | 48.0     |                       |
| DCP2_P3       | FOR                 | TGTGCTGAGCGGAAGACTCTCGTTT       | 15814054-15814635                 | 69.5                | 52.0     | 582                   |
|               | REV                 | GCAGCAGCTGGGAATCGACTTTACG       |                                   | 70.7                | 56.0     |                       |
| DCP2_P4       | FOR                 | ATTTGGCGTAAAGTCGATTC            | 15814605-15815184                 | 56.9                | 40.0     | 580                   |
|               | REV                 | CAAGCAATGAGAAGGTGAGT            |                                   | 55.4                | 45.0     |                       |
| DCP2_P5       | FOR                 | AGGATTTTGACTGGCTGCTG            | 15814960-15815231                 | 60.4                | 50.0     | 272                   |
|               | REV                 | GCGTCAACTGTTCCATAGCC            |                                   | 60.7                | 55.0     |                       |
| DCP2_P6       | FOR                 | GGAACAGTTGACGCTTCGAG            | 15815218- 15815640                | 61.0                | 55.0     | 423                   |
|               | REV                 | GCCTGAAGAAGTGGGTGAAC            |                                   | 59.7                | 55.0     |                       |
| DCP2_P7       | FOR                 | CTTATTGCGTTTCCCATTGC            | 15815330-15815709                 | 60.5                | 45.0     | 380                   |
|               | REV                 | ATGCCATATCAAAGGCCAAG            |                                   | 59.9                | 45.0     |                       |
| DCP2_P8       | FOR                 | AGCCTTCCGATCGTTCACCCAC          | 15815609-15815909                 | 68.8                | 59.1     | 301                   |
|               | REV                 | GGTTTATGAGGAGACCGGGTTCG         |                                   | 66.9                | 56.5     |                       |
| DCP2_P9       | FOR                 | ATGTTTCGCACCACGTACAG            | 15815802- 15816213                | 59.6                | 50.0     | 412                   |
|               | REV                 | GCTATCGGTGCCCACTTATG            |                                   | 60.5                | 55.0     |                       |
| DCP2_P10      | FOR                 | ATAGCGCCATAAGTGGGCACCGATA       | 15816187-15816720                 | 69.9                | 52.0     | 534                   |
|               | REV                 | ACTCCTCCTACGGCAGCTCATCATC       |                                   | 68.0                | 56.0     |                       |
| DCP2_P11      | FOR                 | GATGATGAGCTGCCGTAGGAGGAGT       | 15816696-15817147                 | 68.0                | 56.0     | 452                   |
|               | REV                 | CTATCAGTTTCTTGGGGCCGTGTGC       |                                   | 70.4                | 56.0     |                       |
| DCP2_P12      | FOR                 | GCACACGGCCCCAAGAACTG            | 15817123-15817595                 | 69.2                | 61.9     | 473                   |
|               | REV                 | AGGCTCTTACAAAGGGTGCTTATCGA<br>A |                                   | 66.9                | 44.4     |                       |

|          |     |                                |                    |      |      |     |
|----------|-----|--------------------------------|--------------------|------|------|-----|
| DCP2_P13 | FOR | TCGATAAGCACCCCTTTGTAAGAGCCT    | 15817570-15817972  | 66.2 | 46.2 | 403 |
|          | REV | CACCAGTCTACGTTATCGGGGTCGT      |                    | 68.2 | 56.0 |     |
| DCP2_P14 | FOR | AGTGCTGCAGTACGACCCCGATA        | 15817937-15818367  | 67.1 | 56.5 | 431 |
|          | REV | ACAATCAGAATATCTCCCACCCAGCA     |                    | 67.7 | 46.2 |     |
| DCP2_P15 | FOR | TGCTGGGTGGGAGATATTCTGATTGT     | 15818342-15818617  | 67.7 | 46.2 | 276 |
|          | REV | CGTCTCTGCCTCTGCTAGCGT          |                    | 64.4 | 61.9 |     |
| DCP2_P16 | FOR | ACGCTAGCAGAGGCAGAGAC           | 15818597- 15818806 | 59.9 | 60.0 | 210 |
|          | REV | CAGAGAGAGACGCGAATGTG           |                    | 59.7 | 55.0 |     |
| DCP2_P17 | FOR | AGAGGCAGAGGCTGTGACGAC          | 15818623-15819021  | 64.4 | 61.9 | 399 |
|          | REV | TTCGTGCGACAAAAGCGGACG          |                    | 70.7 | 57.1 |     |
| DCP2_P18 | FOR | TGCAATCGTCCGCTTTTGTCGCA        | 15818995-15819495  | 73.6 | 52.2 | 501 |
|          | REV | AGAGGAAGGCGAGTTTTGAGCAGT       |                    | 65.9 | 50.0 |     |
| DCP2_P19 | FOR | TGCTCACCGAACTTTTCGCGATCT       | 15819379-15819751  | 70.7 | 48.0 | 373 |
|          | REV | GTGCAACGGAAGGGAATCTAACTGT<br>G |                    | 67.8 | 50.0 |     |
| DCP2_P20 | FOR | CACAGTTAGATTCCCTTCCGTTGCAC     | 15819726- 15820171 | 67.8 | 50.0 | 446 |
|          | REV | ACAAAGCACGTCCAGGGCCA           |                    | 68.4 | 60.0 |     |

**Supplementary Table S5.** Overlapping set of primers to amplify the genomic region in *DCP2* gene for the region covered by the DCP2\_P19 set of primers in the homozygous *l(3)tb* mutant.

| PRIMER SYMBOL | PRIMER DETAILS                  |                                |                     |                         |                                         |                        |             |
|---------------|---------------------------------|--------------------------------|---------------------|-------------------------|-----------------------------------------|------------------------|-------------|
|               | PRIMER<br>(10<br>pmol/ $\mu$ L) | SEQUENCE (5'→3')               | TEMPLAT<br>E STRAND | LENGT<br>H (in<br>ntd.) | MOLECULAR<br>POSITIONS<br>(FlyBase, R5) | T <sub>m</sub><br>(°C) | 'GC'<br>(%) |
| DCP2_P19_1    | FOR                             | TAAATTGCCTTTATTTACACGTTGC      | PLUS (+)            | 25                      | 15819403-15819518                       | 60.6                   | 32.0        |
|               | REV                             | ACTATTTCTATACGCGACGCTGAAG      | MINUS(-)            | 25                      |                                         | 62.1                   | 44.0        |
| DCP2_P19_2    | FOR                             | ACTATTTAACGGGCTTTTCAACTG       | PLUS (+)            | 24                      | 15819452-15819569                       | 60.0                   | 37.5        |
|               | REV                             | CGGTATATTTTGGTATCTTAGTGAGC     | MINUS(-)            | 26                      |                                         | 58.7                   | 38.5        |
| DCP2_P19_3    | FOR                             | CAGCGTCGCGTATAGAAATAGTATG      | PLUS (+)            | 25                      | 15819497-15819622                       | 67.7                   | 46.2        |
|               | REV                             | AGTACATTTATCACAGAGCCAAGT       | MINUS(-)            | 25                      |                                         | 58.8                   | 40.0        |
| DCP2_P19_4    | FOR                             | GCTCACTAAGATACCAAAATATACC<br>G | PLUS (+)            | 26                      | 15819544-15819657                       | 58.7                   | 38.5        |
|               | REV                             | AAAATAAGCAAATAACGTAAGACAG<br>G | MINUS(-)            | 26                      |                                         | 58.5                   | 30.8        |
| DCP2_P19_5    | FOR                             | AAGCCTGTCTTACGTTATTTGCTTA      | PLUS (+)            | 25                      | 15819629-15819764                       | 59.8                   | 36.0        |
|               | REV                             | CAACTACAAGTAAGTGCAACGGAAG      | MINUS(-)            | 25                      |                                         | 61.4                   | 44.0        |

**Supplementary Table S6.** Overlapping set of primers to amplify the complete 5'UTR of genomic region in *DCP2* gene in the homozygous *l(3)tb* mutant. The table also documents the thermal cycler conditions of annealing temperature and extension time for each primer pair. Genomic region amplified by primer pair is also mentioned.

| PRIMER SYMBOL | PRIMER DETAILS      |                           |                                   |                     |          |                       |
|---------------|---------------------|---------------------------|-----------------------------------|---------------------|----------|-----------------------|
|               | PRIMER (10 pmol/μL) | SEQUENCE (5'→3')          | MOLECULAR POSITIONS (FlyBase, R5) | T <sub>m</sub> (°C) | 'GC' (%) | AMPLICON SIZE (in bp) |
| DCP2_5'UTR1   | FOR                 | GTACTCTAGTTATTCCATCGGTTGC | 15819051-15819563                 | 59.5                | 44.0     | 513                   |
|               | REV                 | ATTTTGGTATCTTAGTGAGCAGCAT |                                   | 59.6                | 36.0     |                       |
| DCP2_5'UTR2   | FOR                 | TTTGTCTATTGTTCTCTCGATTTTC | 15819085-15819652                 | 60.1                | 32.0     | 568                   |
|               | REV                 | AAGCAAATAACGTAAGACAGGCTTT |                                   | 60.8                | 36.0     |                       |
| DCP2_5'UTR3   | FOR                 | AAGCCTGTCTTACGTTATTTGCTTA | 15819629-15820187                 | 59.8                | 36.0     | 459                   |
|               | REV                 | TCTGTTCTCTACGGATACAAAGCAC |                                   | 61.0                | 44.0     |                       |
